# Supplementary material for: Analysis of Tks4 Knockout Mice Suggests a Role for Tks4 in Adipose Tissue Homeostasis in the Context of Beigeing
Source: MDPI journal article supplement (doi:10.3390/cells8080831), 2019-08-05
Supplement: s1 [file s1]

Table S1

| Functional gene-groups:                  | Symbol   | Fold change (RQ) | p value of 2 <sup>-dCT</sup> | Role in PPAR $\gamma$ signaling                       | Description                                                                        | Gene name                                                           |
|------------------------------------------|----------|------------------|------------------------------|-------------------------------------------------------|------------------------------------------------------------------------------------|---------------------------------------------------------------------|
| Pro-adipogenesis related genes:          | Axin1    | 2,00             | 0,043                        |                                                       | Axin 1                                                                             | AI316800/Axin/Fu/Kb/Ki/fused/kinky/knobly                           |
|                                          | Ccnd1    | 1,66             | 0,428                        |                                                       | Cyclin D1                                                                          | AI327039/CycD1/Cyl-1/PRAD1/bcl-1/cD1                                |
|                                          | Lmna     | 0,63             | 0,009                        |                                                       | Lamin A                                                                            | Dhe                                                                 |
|                                          | Cebpb    | 0,61             | 0,096                        |                                                       | CCAAT/enhancer binding protein (C/EBP), beta                                       | C/EBPbeta/CRP2/IL-6DBP/LAP/LIP/NF-IL6/NF-M/Nfil6                    |
|                                          | Irs2     | 0,48             | 0,185                        | PPAR $\gamma$ target gene                             | Insulin receptor substrate 2                                                       | Irs-2                                                               |
|                                          | Slc2a4   | 0,48             | 0,051                        | PPAR $\gamma$ target gene                             | Solute carrier family 2 (facilitated glucose transporter), member 4, GLUT4         | Glut-4/Glut4                                                        |
|                                          | Lpl      | 0,41             | 0,036                        | PPAR $\gamma$ target gene                             | Lipoprotein lipase                                                                 | -                                                                   |
|                                          | Pparg    | 0,41             | 0,072                        | PPAR $\gamma$ target gene                             | Peroxisome proliferator activated receptor gamma                                   | Nr1c3/PPAR-gamma/PPAR-gamma2/PPARgamma/PPARgamma2                   |
|                                          | Fasn     | 0,37             | 0,127                        | PPAR $\gamma$ target gene                             | Fatty acid synthase                                                                | A630082H08Rik/FAS                                                   |
|                                          | Cebpd    | 0,35             | 0,059                        |                                                       | CCAAT/enhancer binding protein (C/EBP), delta                                      | -                                                                   |
|                                          | Sfrp5    | 0,01             | 0,019                        |                                                       | Secreted frizzled-related sequence protein 5                                       | AI605071/SARP3                                                      |
|                                          |          |                  |                              |                                                       |                                                                                    |                                                                     |
| Anti-adipogenesis related genes:         | Vdr      | 70,62            | 0,091                        |                                                       | Vitamin D receptor                                                                 | Nr1i1                                                               |
|                                          | Wnt1     | 24,61            | 0,003                        |                                                       | Wingless-related MMTV integration site 1                                           | Int-1/Wnt-1/sw/swaying                                              |
|                                          | Dlk1     | 15,89            | 0,018                        |                                                       | Delta-like 1 homolog (Drosophila)                                                  | AW742678/DLK-1/Dkl/FA1/Ly107/Peg9/SCP1/ZOG/pG2/pref-1               |
|                                          | Shh      | 7,11             | 0,407                        |                                                       | Sonic hedgehog                                                                     | 9530036O11Rik/Dsh/Hhg1/Hx/Hxl3/M100081                              |
|                                          | Wnt3a    | 4,72             | 0,279                        |                                                       | Wingless-related MMTV integration site 3A                                          | Wnt-3a/vt                                                           |
|                                          | Runx1t1  | 3,41             | 0,095                        |                                                       | Runt-related transcription factor 1; translocated to, 1 (cyclin D-related)         | Cbfa2t1h/ETO/MTG8                                                   |
|                                          | Sirt1    | 2,96             | 0,099                        | Corepressor of PPAR $\gamma$                          | Sirtuin 1 (silent mating type information regulation 2, homolog) 1 (S. cerevisiae) | AA673258/SIR2L1/Sir2/Sir2a/Sir2alpha                                |
|                                          | Ddit3    | 2,43             | 0,199                        |                                                       | DNA-damage inducible transcript 3                                                  | CHOP-10/CHOP10/chop/gadd153                                         |
|                                          | Sirt2    | 2,13             | 0,253                        |                                                       | Sirtuin 2 (silent mating type information regulation 2, homolog) 2 (S. cerevisiae) | 5730427M03Rik/SIR2L2/Sir2l                                          |
|                                          | Cdkn1b   | 1,93             | 0,019                        |                                                       | Cyclin-dependent kinase inhibitor 1B                                               | AA408329/AI843786/Kip1/p27/p27Kip1                                  |
|                                          | Hes1     | 1,87             | 0,021                        |                                                       | Hairy and enhancer of split 1 (Drosophila)                                         | Hry/bHLHb39                                                         |
|                                          | Lrp5     | 1,71             | 0,113                        |                                                       | Low density lipoprotein receptor-related protein 5                                 | BMND1/HBM/LR3/LRP7/OPPG/mKIAA4142                                   |
|                                          | Cdkn1a   | 0,55             | 0,290                        |                                                       | Cyclin-dependent kinase inhibitor 1A (P21)                                         | CAP20/CDKI/CIP1/Cdkn1/P21/SDI1/Waf1/mda6/p21Cip1/p21WAF             |
|                                          | Adrb2    | 0,45             | 0,064                        |                                                       | Adrenergic receptor, beta 2                                                        | Adrb-2/Badm/Gpcr7                                                   |
|                                          |          |                  |                              |                                                       |                                                                                    |                                                                     |
|                                          | Adipoq   | 0,50             | 0,207                        | PPAR $\gamma$ target gene                             | Adiponectin, C1Q and collagen domain containing                                    | 30kDa/APN/Acdc/Acrp30/Ad/GBP28/adipo/apM1                           |
|                                          | Retn     | 0,38             | 0,087                        | PPAR $\gamma$ target gene                             | Resistin                                                                           | ADSF/Fizz3/Rstrn/Xcp4                                               |
| Adipogen enzyme:                         | Lep      | 0,13             | 0,038                        |                                                       | Leptin                                                                             | ob/obese                                                            |
|                                          | Lipe     | 0,35             | 0,037                        | PPAR $\gamma$ target gene                             | Lipase, hormone sensitive                                                          | 4933403G17Rik/HSL                                                   |
| Pro-Brown Adipose Tissue related genes:  | Ucp1     | 12,14            | 0,158                        |                                                       | Uncoupling protein 1 (mitochondrial, proton carrier)                               | AI385626/Slc25a7/Ucp                                                |
|                                          | Dio2     | 6,41             | 0,385                        |                                                       | Deiodinase, iodothyronine, type II                                                 | 5DI/II/AI324267/DIOII                                               |
|                                          | Ppargc1a | 3,76             | 0,073                        | Cofactor of PPAR $\gamma$ , PPAR $\gamma$ target gene | Peroxisome proliferative activated receptor, gamma, coactivator 1 alpha (PGC-1a)   | A830037N07Rik/ENSMUSG00000079510/Gm11133/Pgc-1a/Pgc1/Pgco1/Ppargc1a |
|                                          | Sirt3    | 3,19             | 0,078                        | PPAR $\gamma$ target gene                             | Sirtuin 3 (silent mating type information regulation 2, homolog) 3 (S. cerevisiae) | 2310003L23Rik/AI848213/Sir2i3                                       |
|                                          | Prdm16   | 2,93             | 0,248                        |                                                       | PR domain containing 16                                                            | 5730557K01Rik/csp1/mel1                                             |
|                                          | Ppara    | 2,82             | 0,076                        |                                                       | Peroxisome proliferator activated receptor alpha                                   | 4933429D07Rik/AW742785/Nr1c1/PPAR-alpha/PPARalpha/Ppar              |
|                                          | Ppargc1b | 2,81             | 0,314                        |                                                       | Peroxisome proliferative activated receptor, gamma, coactivator 1 beta (PGC-1b)    | 4631412G21Rik/Perc                                                  |
|                                          | Nrf1     | 2,32             | 0,163                        |                                                       | Nuclear respiratory factor 1                                                       | C87038/D6Ert415e                                                    |
|                                          | Src      | 1,80             | 0,072                        |                                                       | Rous sarcoma oncogene                                                              | AW259666/pp60c-src                                                  |
|                                          | Bmp7     | 1,50             | 0,257                        |                                                       | Bone morphogenetic protein 7                                                       | OP1                                                                 |
|                                          | Irs1     | 0,65             | 0,186                        |                                                       | Insulin receptor substrate 1                                                       | G972R/IRS-1                                                         |
|                                          |          |                  |                              |                                                       |                                                                                    |                                                                     |
| Anti-Brown Adipose Tisse related genes:  | Nr0b2    | 7,02             | 0,137                        | Cofactor of PPAR $\gamma$                             | Nuclear receptor subfamily 0, group B, member 2                                    | Wnt12                                                               |
|                                          | Ncoa2    | 2,70             | 0,112                        | Cofactor of PPAR $\gamma$                             | Nuclear receptor coactivator 2                                                     | Rb/Rb-1/pRb                                                         |
|                                          | Twist1   | 0,58             | 0,278                        |                                                       | Twist homolog 1 (Drosophila)                                                       | D1Ert433e/GRIP-1/Grip1/KAT13C/NCoA-2/SRC-2/TIF2/bHLHe75             |
|                                          | Nr1h3    | 0,54             | 0,177                        |                                                       | Nuclear receptor subfamily 1, group H, member 3                                    | M-Twist/Pde/Ska10/Ska<m10Jus>/Twist/bHLHa38/pdt                     |
|                                          | Wnt10b   | 0,44             | 0,021                        |                                                       | Wingless related MMTV integration site 10b                                         | AU018371/LXR/RLD1/Unr1                                              |
| Pro-White Adipose Tisse related genes:   | Bmp4     | 1,97             | 0,351                        |                                                       | Bone morphogenetic protein 4                                                       | Bmp-4/Bmp2b/Bmp2b-1/Bmp2b1                                          |
|                                          | Klf4     | 1,66             | 0,269                        |                                                       | Kruppel-like factor 4 (gut)                                                        | EZF/Gklf/Zie                                                        |
|                                          | Fgf10    | 0,45             | 0,124                        |                                                       | Fibroblast growth factor 10                                                        | AEY17/BB213776/Fgf-10/Gsfaey17                                      |
|                                          | Egr2     | 0,36             | 0,094                        |                                                       | Early growth response 2                                                            | Egr-2/Krox-20/Krox20/NGF1-B/Zfp-25/Zfp-6                            |
|                                          |          |                  |                              |                                                       |                                                                                    |                                                                     |
| Anti-White Adipose Tissue related genes: | Gata2    | 4,85             | 0,095                        |                                                       | GATA binding protein 2                                                             | Gata-2                                                              |
|                                          | Gata3    | 2,41             | 0,425                        |                                                       | GATA binding protein 3                                                             | Gata-3/jal                                                          |

**Table S1. Results of the Mouse Adipogenesis RT<sup>2</sup> Profile Array.** Fold changes labelled in red indicate upregulated genes while those labelled in green indicate downregulated genes in the Tks4-KO gWAT relative to their levels in the WT animals. The up- and downregulated genes in the table were included in the ARN analysis, the results of which are presented in Figure 3E. The statistical significance of the 2<sup>- $\Delta$ CT</sup> data was assessed via unpaired Student's t-tests.
